# Supplementary material for: Discrepancies between ClinicalTrials.gov recruitment status and actual trial status: a cross-sectional analysis
Source: PubMed Central journal article supplement — BMJ Open. 2017 Oct 11;7(10):e017719. doi: 10.1136/bmjopen-2017-017719 (PMC5652524; doi:10.1136/bmjopen-2017-017719), 2017-10-11
Supplement: bmjopen-2017-017719.draft_revisions.pdf [file bmjopen-2017-017719.draft_revisions.pdf]

# BMJ Open

BMJ Open is committed to open peer review. As part of this commitment we make the peer review history of every article we publish publicly available.

When an article is published we post the peer reviewers' comments and the authors' responses online. We also post the versions of the paper that were used during peer review. These are the versions that the peer review comments apply to.

The versions of the paper that follow are the versions that were submitted during the peer review process. They are not the versions of record or the final published versions. They should not be cited or distributed as the published version of this manuscript.

BMJ Open is an open access journal and the full, final, typeset and author-corrected version of record of the manuscript is available on our site with no access controls, subscription charges or pay-per-view fees (<http://bmjopen.bmj.com>).

If you have any questions on BMJ Open's open peer review process please email [editorial.bmjopen@bmj.com](mailto:editorial.bmjopen@bmj.com)

# BMJ Open

## Discrepancies between ClinicalTrials.gov Recruitment Status and Actual Trial Status: a Cross-Sectional Analysis

|                                 |                                                                                                                                                                                                                                                                                                                                              |
|---------------------------------|----------------------------------------------------------------------------------------------------------------------------------------------------------------------------------------------------------------------------------------------------------------------------------------------------------------------------------------------|
| Journal:                        | <i>BMJ Open</i>                                                                                                                                                                                                                                                                                                                              |
| Manuscript ID                   | bmjopen-2017-017719                                                                                                                                                                                                                                                                                                                          |
| Article Type:                   | Research                                                                                                                                                                                                                                                                                                                                     |
| Date Submitted by the Author:   | 29-May-2017                                                                                                                                                                                                                                                                                                                                  |
| Complete List of Authors:       | Jones, Christopher; Cooper Medical School of Rowan University, Emergency Medicine<br>Safferman, Michelle; Cooper Medical School of Rowan University, Emergency Medicine<br>Adams, Amanda; Cooper Medical School of Rowan University, Medical Library<br>Platts-Mills, Timothy; University of North Carolina, Chapel Hill, Emergency Medicine |
| <b>Primary Subject Heading</b>: | Research methods                                                                                                                                                                                                                                                                                                                             |
| Secondary Subject Heading:      | Epidemiology                                                                                                                                                                                                                                                                                                                                 |
| Keywords:                       | EPIDEMIOLGY, World Wide Web technology < BIOTECHNOLOGY & BIOINFORMATICS, trial registration, ClinicalTrials.gov                                                                                                                                                                                                                              |
|                                 |                                                                                                                                                                                                                                                                                                                                              |

SCHOLARONE™  
Manuscripts

1  
2  
3  
4  
5  
6  
7  
8  
9  
10  
11  
12  
13  
14  
15  
16  
17  
18  
19  
20  
21  
22  
23  
24  
25  
26  
27  
28  
29  
30  
31  
32  
33  
34  
35  
36  
37  
38  
39  
40  
41  
42  
43  
44  
45  
46  
47  
48  
49  
50  
51  
52  
53  
54  
55  
56  
57  
58  
59  
60

1 **Discrepancies between ClinicalTrials.gov Recruitment Status and Actual Trial Status: a Cross-Sectional**  
2 **Analysis**

4 Christopher W Jones MD\*, Michelle R Safferman BS, Amanda C Adams MLS, Timothy F Platts-Mills MD,  
5 MSc

8 \*Corresponding author:  
9 Christopher Jones  
10 Department of Emergency Medicine  
11 Cooper Medical School of Rowan University  
12 One Cooper Plaza, Suite 152. Camden, NJ. 08103  
13 Jones-christopher@cooperhealth.edu

15 Michelle Safferman  
16 Department of Emergency Medicine  
17 Cooper Medical School of Rowan University  
18 One Cooper Plaza, Suite 152. Camden, NJ. 08103  
19 saffermam7@rowan.edu

21 Amanda Adams  
22 Medical Library  
23 Cooper Medical School of Rowan University  
24 One Cooper Plaza. Camden, NJ. 08103  
25 adams-amanda@cooperhealth.edu

27 Timothy Platts-Mills  
28 Department of Emergency Medicine  
29 University of North Carolina, Chapel Hill.  
30 170 Manning Dr, CB#7594. Chapel Hill, NC 27599.  
31 Tim\_platts-mills@med.unc.edu

33  
34  
35  
36

1  
2  
3 37 **Objectives:** to determine the accuracy of the recruitment status listed on ClinicalTrials.gov as compared  
4  
5 38 to the actual trial status.  
6  
7

8 39 **Design:** Cross-sectional analysis  
9

10 40 **Setting:** Random sample of interventional phase 2-4 clinical trials registered between 2012 and 2015 on  
11  
12 41 ClinicalTrials.gov.  
13

14 42 **Primary outcome measure:** For each trial which was listed within ClinicalTrials.gov as ongoing, two  
15  
16 43 investigators performed a comprehensive literature search for evidence that the trial had actually been  
17  
18 44 completed. For each trial listed as completed or stopped early by ClinicalTrials.gov we compared the  
19  
20 45 date that the trial was actually concluded with the date the registry was updated to reflect the study's  
21  
22 46 conclusion status.  
23  
24

25 47 **Results:** Among the 405 included trials, 92 had a registry status indicating that study activity was either  
26  
27 48 ongoing or the recruitment status was unknown. Of these, published results were available for 34 (37%).  
28  
29 49 Among the 313 concluded trials, the median delay between study completion and a registry update  
30  
31 50 reflecting that the study had ended was 141 days (IQR 48-419), with delays of over one year present for  
32  
33 51 29%. In total, 125 trials (31%) either had a listed recruitment status which was incorrect or had a delay  
34  
35 52 of more than one year between the time the study was concluded and the time the registry recruitment  
36  
37 53 status was updated.  
38  
39

40 54 **Conclusions:** At present, registry recruitment status information in ClinicalTrials.gov is often outdated  
41  
42 55 or wrong. This inaccuracy has implications for the ability of researchers to identify completed trials and  
43  
44 56 accurately characterize all available medical knowledge on a given subject.  
45  
46  
47  
48  
49  
50  
51  
52  
53  
54  
55  
56  
57  
58  
59  
60

1  
2  
3 58 **Article Summary**  
4

5  
6 59 **Strengths and limitations of this study:**  
7  
8

9  
10 60 - Registry recruitment status is often used to identify completed clinical trials, yet the reliability of this  
11  
12 61 information has not been previously assessed.  
13

14  
15 62 - The study involved comprehensive, independent literature searches by multiple investigators, including  
16  
17 63 a medical research librarian.  
18  
19

20  
21 64 - This study design is unable to identify studies which were completed but not published.  
22  
23

24 65  
25  
26  
27  
28  
29  
30  
31  
32  
33  
34  
35  
36  
37  
38  
39  
40  
41  
42  
43  
44  
45  
46  
47  
48  
49  
50  
51  
52  
53  
54  
55  
56  
57  
58  
59  
60

## 66 INTRODUCTION

67 Clinical trial registries play an essential role in helping to ensure the integrity of the published medical  
68 literature.[1] When utilized appropriately by investigators and sponsors, registration helps to ensure  
69 that a publically accessible trial record exists even when results are not published in a peer-reviewed  
70 journal, and that published outcome measures are consistent with prospectively specified trial  
71 outcomes. For these reasons, trial registries are a particularly important tool for systematic reviewers as  
72 they attempt to identify both published and unpublished trial data in order to assess for the possibility  
73 of publication bias.[2]

74 Despite the critical importance of trial registration, compliance with requirements from both the  
75 International Committee of Medical Journal Editors (ICMJE) and governmental regulators which  
76 mandate the prospective registration of clinical trials has been imperfect.[3 4] Meta-researchers have  
77 begun using data from ClinicalTrials.gov and other registries to identify these patterns of limited  
78 compliance in order to publicize and monitor deficiencies.[1 5 6]

79 Systematic reviewers and meta-researchers often limit registry searches to trials for which enrollment is  
80 documented to have been completed in the registry.[5 7-13] Restricting reviews to completed studies  
81 makes sense because these are the studies for which all the data is completed and for which the results  
82 either are known or could be known. However, little is known about delays between the time of study  
83 completion and the time that ClinicalTrials.gov is updated to reflect this completion, or the percentage  
84 of completed trials which remain listed with an ongoing status in ClinicalTrials.gov indefinitely. If these  
85 delays are significant or a large proportion of registry entries are never updated to reflect study  
86 completion, then limiting registry searches to only entries with a completed registry status might miss  
87 otherwise relevant trials.

1  
2  
3 88 The objective of this study is to quantify delays observed between the end of enrollment in registered  
4  
5 89 clinical trials, and the time that the registry entries are updated to reflect that enrollment has ended.  
6  
7  
8  
9 90

## 11 91 **METHODS**

### 15 92 **Study selection and data collection**

18 93 We searched ClinicalTrials.gov for phase 2-4 interventional studies registered between 01/01/2012 and  
19  
20 94 12/31/2015. From these potentially eligible trials (n=30,524) we randomly selected 500 studies for  
21  
22  
23 95 analysis. Studies with a recruiting status of withdrawn were excluded, as this indicates that the study  
24  
25 96 was halted prior to enrolling any participants. For each included trial, we obtained information on study  
26  
27 97 phase, size, sponsor, participant demographics, and recruitment status as of January 1, 2017 directly  
28  
29  
30 98 from ClinicalTrials.gov.

33 99 Dates for the following events were also recorded from ClinicalTrials.gov for each included trial: initial  
34  
35 100 registration, study start, and primary completion date (date on which primary outcome data for the last  
36  
37 101 trial participant were collected). When the primary completion date field was missing, we used the  
38  
39  
40 102 study completion date (final date on which any trial data were collected). We considered trials with  
41  
42 103 recruitment statuses of either completed (study concluded normally) or terminated (recruitment  
43  
44 104 stopped prematurely and will not resume) to indicate that the study had ended and was unlikely to  
45  
46 105 resume activity. These trials were classified as concluded. We recorded the dates on which the registry  
47  
48  
49 106 entries were updated to reflect that trials had concluded. Recruiting statuses which did not clearly  
50  
51 107 reflect that the trial had concluded were recruiting, enrolling by invitation, not yet recruiting, active not  
52  
53 108 recruiting, suspended, and unknown. Trials which were registered more than one month after the study  
54  
55  
56 109 start date were considered retrospectively registered.  
57  
58  
59  
60

### 110 **Ongoing or Unknown Completion Status Trials**

111 For studies which were scheduled to have been completed prior to January 2016 and did not have an  
112 updated recruitment status indicating that they had concluded, we performed a comprehensive  
113 literature search to identify published evidence that the trial might in fact have been completed. An  
114 investigator first searched Medline via PubMed using trial registration number, keywords, condition  
115 studied, intervention, trial title, and investigators' names for matching manuscripts. When the first  
116 search identified no corresponding publication, a research librarian repeated this search using PubMed,  
117 Embase, and Google Scholar. The final publication search occurred between January and February of  
118 2017.

119 We assessed matches between registry entries and publications identified by this search strategy using  
120 the following trial characteristics: study title, trial design, interventions, primary and secondary  
121 outcomes, number of participants, recruitment dates, location, and funding sources. We did not  
122 consider trials to be published if the publication did not include outcome data from the primary trial. For  
123 example, trial protocols for ongoing trials were not considered evidence of trial completion. We did  
124 consider published abstracts and presentations at scientific meetings to be evidence of trial completion,  
125 and counted these as publications for this analysis. For the group of included trials with an ongoing or  
126 unknown recruitment status listed in the registry, the primary outcome was the proportion of studies  
127 with outcomes published in the medical literature.

### 128 **Concluded Trials**

129 For studies which were indicated to be concluded based on the recruitment status listed in  
130 ClinicalTrials.gov, the primary outcome was the amount of time elapsed between the primary  
131 completion date listed in ClinicalTrials.gov and the date on which the Clinicaltrials.gov registry entry was  
132 actually updated to indicate that the study had ended and was unlikely to resume activity.



1  
2  
3 133 Secondary outcomes included the proportion of studies registered more than one month after study  
4  
5 134 initiation, and the proportion of studies registered after study completion. We also compared results  
6  
7  
8 135 among subgroups based on trial phase, trial size, and funding source.  
9  
10  
11 136 We calculated descriptive data for the primary and secondary outcomes. We also compared the median  
12  
13 137 time elapsed between the change in recruiting status and the time ClinicalTrials.gov was updated to  
14  
15 138 reflect this change between subgroups using Mann Whitney and Kruskal Wallis tests. Chi-square tests  
16  
17 139 were used to make comparisons between categorical variables. P values < 0.05 were considered  
18  
19 140 statistically significant. Statistical analyses were performed using PASW version 18.0 (IBM, Armonk, NY).  
20  
21 141 The dataset generated during the current study is available from the corresponding author on  
22  
23 142 reasonable request.  
24  
25  
26  
27  
28 143  
29  
30  
31 144 **RESULTS**  
32  
33

34 145 Of the 500 potentially eligible trials which were randomly selected for evaluation, 405 were eligible for  
35  
36 146 inclusion (Figure 1). Phase 2, 3, and 4 trials were all well represented within the study sample, and the  
37  
38 147 majority of trials (53%) had received at least partial industry funding (Table 1). A large proportion of  
39  
40 148 trials were registered retrospectively, more than one month after the study had started (39%).  
41  
42  
43

44 149 Out of the 405 included trials, 273 (67%) were listed in ClinicalTrials.gov with a study status of  
45  
46 150 completed, and 40 (10%) had initiated enrollment but were terminated early. Ninety-two trials (23%)  
47  
48 151 had a recruitment status which indicated that trial activities were ongoing or that the study status was  
49  
50 152 unknown, including 22 (5%) listed as active or active but not recruiting, and 70 (17%) listed as having an  
51  
52 153 unknown recruiting status. Of these 92 trials with statuses in ClinicalTrials.gov indicating potentially  
53  
54  
55  
56  
57  
58  
59  
60

1  
2  
3 154 ongoing study activity, we identified a corresponding publication containing outcome data for 34 trials  
4  
5 155 (37%).  
6  
7

8  
9 156 Among the trials with a completed or terminated status (n = 313), 2 were missing the study completion  
10  
11 157 date. Of the remaining 311 trials, the median delay between when a trial was completed and when  
12  
13 158 ClinicalTrials.gov was updated to reflect this change was 142 days (IQR 48-419), with a mean delay of  
14  
15 159 340 days. In 91 trials (29%) this delay was greater than 1 year, and in 39 trials (13%) the delay was  
16  
17 160 greater than two years (Figure 2). Eight trials had delays of more than five years. Retrospectively  
18  
19 161 registered trials had a median delay of 266 days (IQR 62-650 days) between trial completion and when  
20  
21 162 the registered recruitment status was updated, compared to a median of 116 days (IQR 38-260) for  
22  
23 163 prospectively registered trials (p < 0.001). Observed delays did not differ between trials according to  
24  
25 164 funding source or trial phase.  
26  
27  
28  
29

30 165 When considering all 405 included trials, 125 (31%) either had a listed recruitment status which was  
31  
32 166 incorrect (ie trial had been completed but was not listed as such) or had a delay of more than one year  
33  
34 167 between the time the study was completed and the time the recruitment status was updated.  
35  
36 168 Retrospectively registered trials were more likely than prospectively registered trials to have one of  
37  
38 169 these major discrepancies in recruitment status, with discrepancies observed for 46% of retrospectively  
39  
40 170 registered trials and 21% of prospectively registered trials (p < 0.001). These recruitment status  
41  
42 171 discrepancies did not differ among trials based on funding source or trial phase.  
43  
44  
45  
46  
47  
48  
49

## 50 173 **DISCUSSION**

51  
52  
53 174 Among this sample of over 400 phase 2-4 trials registered with ClinicalTrials.gov between 2012 and 2015  
54  
55 175 we identified frequent discrepancies between trial recruitment statuses listed on ClinicalTrials.gov and  
56  
57  
58  
59  
60

1  
2  
3 176 the actual trial status. Specifically, 37% of trials which were indicated to be ongoing based on available  
4  
5 177 information within the registry had been completed and published. Among completed trials, 29% had a  
6  
7  
8 178 delay of more than a year between trial completion and the ClinicalTrials.gov update reporting trial  
9  
10 179 completion.

11  
12  
13 180 Trial registries are an important tool by which both the authors of clinical guidelines and systematic  
14  
15 181 reviewers can identify relevant clinical trials.[2 14] However, in both cases authors often assume that  
16  
17  
18 182 the listed enrollment status is accurate and either restrict their registry searches to completed trials,[7-  
19  
20 183 9] or conclude that those trials with active enrollment statuses are actually still ongoing.[15-19] Our  
21  
22 184 findings show that this assumption is incorrect for a substantial portion of trials. One potential solution  
23  
24  
25 185 is to not limit registry searches to completed trials. For trials which are listed as ongoing, efforts should  
26  
27 186 be made to confirm the enrollment status or search for published results regardless of the registered  
28  
29 187 enrollment status.

30  
31  
32 188 Trial registries serve as a critical source of data about ongoing and completed trials which supplements  
33  
34 189 the published medical literature. However, our findings are consistent with previous studies which have  
35  
36  
37 190 demonstrated that registry information is at times incomplete or out of date. [5 20] This work is  
38  
39 191 performed by meta-researchers, who use registry information to measure compliance with trial  
40  
41  
42 192 registration requirements and to monitor the conduct and reporting of clinical trials.[1] In order to  
43  
44 193 accurately perform this function, it is also important for meta-researches to recognize the limitations we  
45  
46 194 describe with respect to registered trial recruiting statuses. This is particularly important for registry-  
47  
48  
49 195 based investigations into publication bias, as excluding registered trials with a registry status indicating  
50  
51 196 that recruitment is ongoing may miss trials which have actually finished enrollment without updating  
52  
53 197 the associated registry entry.[5 10-13]

1  
2  
3 198 Several important limitations should be considered when interpreting these results. First, our findings  
4  
5 199 are based on a sample of phase 2-4 trials registered from 2012 to 2015; these general results may not be  
6  
7  
8 200 applicable to specific classes of clinical trials, and the patterns we observed may change over time.  
9  
10 201 Additionally, we performed a literature search to identify trials which were listed in the registry as being  
11  
12 202 ongoing, but which had actually been completed. It is likely that some additional trials were completed  
13  
14 203 but not yet published; our search would not have identified these trials. Similarly, our literature search  
15  
16 204 may have missed some trials. For these reasons, we may have underestimated the percentage of trials  
17  
18  
19 205 which were completed without updating the registry's recruitment status.  
20  
21

## 22 206 **CONCLUSIONS**

23  
24  
25  
26 207 In summary, we observed that a significant percentage of clinical trials registered in ClinicalTrials.gov  
27  
28 208 with a recruitment status indicating that the trial is ongoing have actually been completed. Additionally,  
29  
30 209 among completed trials, we observed significant delays in updating the ClinicalTrials.gov recruitment  
31  
32 210 status. Individuals utilizing registry data to supplement a systematic literature search and meta-  
33  
34 211 researchers using registry data to study the conduct and reporting of clinical trials should be aware of  
35  
36  
37 212 these findings to avoid unwarranted assumptions about the recruitment status of registered trials.  
38  
39  
40  
41  
42  
43  
44  
45  
46  
47  
48  
49  
50  
51  
52  
53  
54  
55  
56  
57  
58  
59  
60

1  
2  
3 213 **Funding:** This research received no specific grant from any funding agency in the public, commercial or  
4  
5 214 not-for-profit sectors  
6

7  
8 215  
9

10 216 **Acknowledgements:** None  
11

12 217  
13

14  
15 218 **Authors' contributions:** CJ conceived the study. CJ, MS, AA, and TP all contributed to the study design.  
16

17 219 CJ, MS, and AA performed data collection. CJ performed data analysis and interpretation and drafted the  
18  
19 220 article. All authors provided critical revisions to the article, and all authors read and approved the final  
20  
21 221 manuscript.  
22

23  
24 222  
25

26 223 **Competing interests:** We have read and understood BMJ policy on declaration of interests and declare  
27

28 224 the following interests: CJ is an investigator on unrelated studies sponsored by AstraZeneca, Roche  
29

30 225 Diagnostics, Inc, and Janssen, for which his department received research grants. The remaining authors  
31

32 226 declare no additional competing interests.  
33  
34

35 227  
36  
37

38 228 **Ethics approval:** N/a  
39

40  
41  
42 229 **Data sharing:** The full dataset is available from the corresponding author on reasonable request.  
43  
44

45 230  
46  
47

48 231  
49

50 232  
51

52 233  
53

54 234  
55  
56  
57  
58  
59  
60

## 235 REFERENCES

- 236 1. Zarin DA, Tse T, Williams RJ, et al. Update on Trial Registration 11 Years after the ICMJE Policy Was  
237 Established. *The New England journal of medicine* 2017;**376**(4):383-91 doi:  
238 10.1056/NEJMSr1601330[published Online First: Epub Date]].
- 239 2. Jones CW, Keil LG, Weaver MA, et al. Clinical trials registries are under-utilized in the conduct of  
240 systematic reviews: a cross-sectional analysis. *Systematic reviews* 2014;**3**:126 doi:  
241 10.1186/2046-4053-3-126[published Online First: Epub Date]].
- 242 3. Ross JS, Mulvey GK, Hines EM, et al. Trial publication after registration in ClinicalTrials.gov: a cross-  
243 sectional analysis. *PLoS medicine* 2009;**6**(9):e1000144 doi:  
244 10.1371/journal.pmed.1000144[published Online First: Epub Date]].
- 245 4. Mathieu S, Boutron I, Moher D, et al. Comparison of registered and published primary outcomes in  
246 randomized controlled trials. *Jama* 2009;**302**(9):977-84 doi: 10.1001/jama.2009.1242[published  
247 Online First: Epub Date]].
- 248 5. Anderson ML, Chiswell K, Peterson ED, et al. Compliance with results reporting at ClinicalTrials.gov.  
249 *The New England journal of medicine* 2015;**372**(11):1031-9 doi:  
250 10.1056/NEJMSa1409364[published Online First: Epub Date]].
- 251 6. Jones CW, Keil LG, Holland WC, et al. Comparison of registered and published outcomes in  
252 randomized controlled trials: a systematic review. *BMC medicine* 2015;**13**:282 doi:  
253 10.1186/s12916-015-0520-3[published Online First: Epub Date]].
- 254 7. Jun M, Foote C, Lv J, et al. Effects of fibrates on cardiovascular outcomes: a systematic review and  
255 meta-analysis. *Lancet* 2010;**375**(9729):1875-84 doi: 10.1016/S0140-6736(10)60656-3[published  
256 Online First: Epub Date]].
- 257 8. Karagiannis T, Paschos P, Paletas K, et al. Dipeptidyl peptidase-4 inhibitors for treatment of type 2  
258 diabetes mellitus in the clinical setting: systematic review and meta-analysis. *Bmj*  
259 2012;**344**:e1369 doi: 10.1136/bmj.e1369[published Online First: Epub Date]].
- 260 9. Li L, Shen J, Bala MM, et al. Incretin treatment and risk of pancreatitis in patients with type 2 diabetes  
261 mellitus: systematic review and meta-analysis of randomised and non-randomised studies. *Bmj*  
262 2014;**348**:g2366 doi: 10.1136/bmj.g2366[published Online First: Epub Date]].
- 263 10. Dechartres A, Riveros C, Harroch M, et al. Characteristics and Public Availability of Results of Clinical  
264 Trials on Rare Diseases Registered at Clinicaltrials.gov. *JAMA internal medicine* 2016;**176**(4):556-  
265 8 doi: 10.1001/jamainternmed.2016.0137[published Online First: Epub Date]].
- 266 11. Jones CW, Handler L, Crowell KE, et al. Non-publication of large randomized clinical trials: cross  
267 sectional analysis. *Bmj* 2013;**347**:f6104 doi: 10.1136/bmj.f6104[published Online First: Epub  
268 Date]].
- 269 12. Powell-Smith A, Goldacre B. The TrialsTracker: Automated ongoing monitoring of failure to share  
270 clinical trial results by all major companies and research institutions. *F1000Research*  
271 2016;**5**:2629 doi: 10.12688/f1000research.10010.1[published Online First: Epub Date]].
- 272 13. Ross JS, Tse T, Zarin DA, et al. Publication of NIH funded trials registered in ClinicalTrials.gov: cross  
273 sectional analysis. *Bmj* 2012;**344**:d7292 doi: 10.1136/bmj.d7292[published Online First: Epub  
274 Date]].
- 275 14. Methodology Manual and Policies From the ACCF/AHA Task Force on Practice Guidelines.  
276 [https://professional.heart.org/idc/groups/ahamah-](https://professional.heart.org/idc/groups/ahamah-public/@wcm/@sop/documents/downloadable/ucm_319826.pdf)  
277 [public/@wcm/@sop/documents/downloadable/ucm\\_319826.pdf](https://professional.heart.org/idc/groups/ahamah-public/@wcm/@sop/documents/downloadable/ucm_319826.pdf) Accessed 2/9/2017, 2010.
- 278 15. Robinson PD, Kalkanis SN, Linskey ME, et al. Methodology used to develop the AANS/CNS  
279 management of brain metastases evidence-based clinical practice parameter guidelines. *Journal*  
280 *of neuro-oncology* 2010;**96**(1):11-6 doi: 10.1007/s11060-009-0059-2[published Online First:  
281 Epub Date]].

- 1  
2  
3 282 16. Zarychanski R, Abou-Setta AM, Turgeon AF, et al. Association of hydroxyethyl starch administration  
4 283 with mortality and acute kidney injury in critically ill patients requiring volume resuscitation: a  
5 284 systematic review and meta-analysis. *Jama* 2013;**309**(7):678-88 doi:  
6 285 10.1001/jama.2013.430[published Online First: Epub Date]].  
7  
8 286 17. Ker K, Edwards P, Perel P, et al. Effect of tranexamic acid on surgical bleeding: systematic review and  
9 287 cumulative meta-analysis. *Bmj* 2012;**344**:e3054 doi: 10.1136/bmj.e3054[published Online First:  
10 288 Epub Date]].  
11 289 18. Bergman P, Lindh AU, Bjorkhem-Bergman L, et al. Vitamin D and Respiratory Tract Infections: A  
12 290 Systematic Review and Meta-Analysis of Randomized Controlled Trials. *PLoS one*  
13 291 2013;**8**(6):e65835 doi: 10.1371/journal.pone.0065835[published Online First: Epub Date]].  
14 292 19. Masters GA, Temin S, Azzoli CG, et al. Systemic Therapy for Stage IV Non-Small-Cell Lung Cancer:  
15 293 American Society of Clinical Oncology Clinical Practice Guideline Update. *Journal of clinical*  
16 294 *oncology : official journal of the American Society of Clinical Oncology* 2015;**33**(30):3488-515  
17 295 doi: 10.1200/JCO.2015.62.1342[published Online First: Epub Date]].  
18 296 20. Riveros C, Dechartres A, Perrodeau E, et al. Timing and completeness of trial results posted at  
19 297 *ClinicalTrials.gov* and published in journals. *PLoS medicine* 2013;**10**(12):e1001566 doi:  
20 298 10.1371/journal.pmed.1001566[published Online First: Epub Date]].  
21  
22  
23  
24 299  
25  
26  
27  
28  
29  
30  
31  
32  
33  
34  
35  
36  
37  
38  
39  
40  
41  
42  
43  
44  
45  
46  
47  
48  
49  
50  
51  
52  
53  
54  
55  
56  
57  
58  
59  
60

300 **Table 1.** Characteristics of included trials.

| Trial Characteristics                          | All Trials<br>(n = 405) |
|------------------------------------------------|-------------------------|
| Number of participants,<br>median (IQR)        | 80 (32-225)             |
| Trial phase, n (%)                             |                         |
| Phase 2                                        | 186 (46)                |
| Phase 3 or 2/3                                 | 132 (33)                |
| Phase 4                                        | 87 (21)                 |
| Funding source, n (%) <sup>1</sup>             |                         |
| Industry                                       | 214 (53)                |
| NIH <sup>2</sup> /US Government                | 23 (6)                  |
| Other                                          | 233 (58)                |
| Trial start date, n (%)                        |                         |
| Unlisted                                       | 2 (0)                   |
| Prior to 2006                                  | 15 (4)                  |
| 2006-2009                                      | 37 (9)                  |
| 2010-2011                                      | 235 (58)                |
| 2012-2014                                      | 116 (29)                |
| Registered retrospectively, n (%) <sup>3</sup> | 159 (39)                |
| Registered prospectively, n (%)                | 245 (61)                |

301 <sup>1</sup> Trials could have more than one funding source302 <sup>2</sup> National Institutes of Health303 <sup>3</sup> Registration timing relative to enrollment could not be determined for one study

304

305



1  
2  
3  
4  
5  
6  
7  
8  
9  
10  
11  
12  
13  
14  
15  
16  
17  
18  
19  
20  
21  
22  
23  
24  
25  
26  
27  
28  
29  
30  
31  
32  
33  
34  
35  
36  
37  
38  
39  
40  
41  
42  
43  
44  
45  
46  
47  
48  
49  
50  
51  
52  
53  
54  
55  
56  
57  
58  
59  
60

306 **Figure 1.** Flowchart of included trials.

307

308

309 **Figure 2.** Delays in updating ClinicalTrials.gov following trial conclusion.

310 Legend: Histogram of completed or terminated trials (n=311), depicting delays between the actual date  
311 of trial conclusion and the date on which ClinicalTrials.gov was updated to indicate trial conclusion.<sup>1</sup>

312

313 <sup>1</sup> Does not show eight outliers with delays of greater than 54 months. Trial completion dates were also  
314 not listed for two trials.

For peer review only

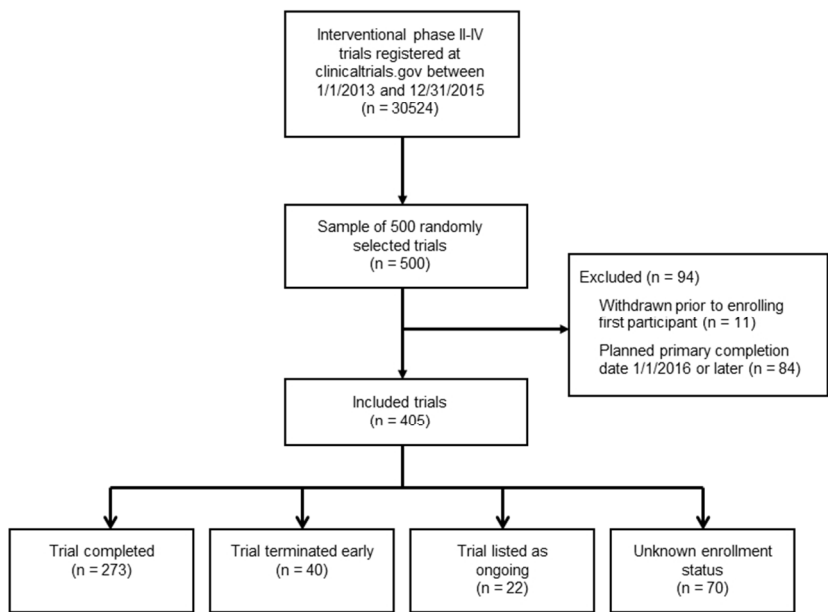

Figure 1. Flowchart of included trials

Figure 1

254x190mm (96 x 96 DPI)

ew only

1  
2  
3  
4  
5  
6  
7  
8  
9  
10  
11  
12  
13  
14  
15  
16  
17  
18  
19  
20  
21  
22  
23  
24  
25  
26  
27  
28  
29  
30  
31  
32  
33  
34  
35  
36  
37  
38  
39  
40  
41  
42  
43  
44  
45  
46  
47  
48  
49  
50  
51  
52  
53  
54  
55  
56  
57  
58  
59  
60

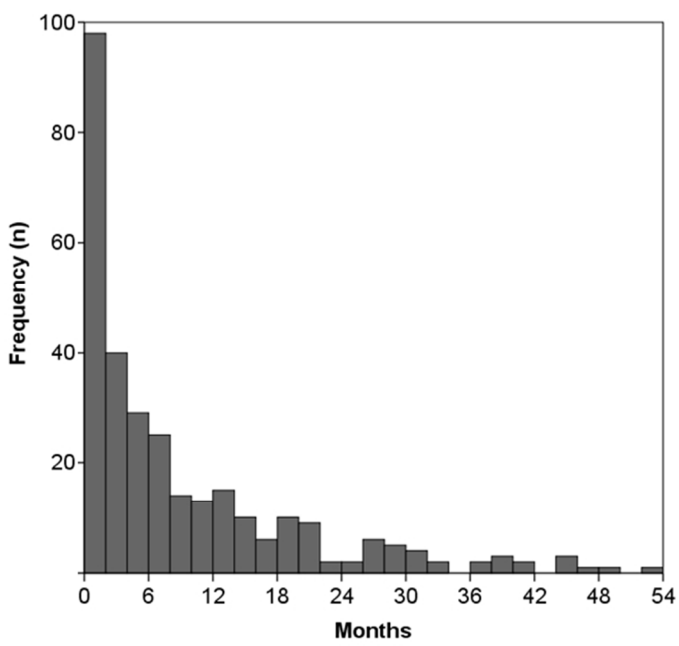

Figure 2  
215x279mm (96 x 96 DPI)

STROBE 2007 (v4) Statement—Checklist of items that should be included in reports of *cross-sectional studies*

| Section/Topic                | Item # | Recommendation                                                                                                                                                                       | Reported on page # |
|------------------------------|--------|--------------------------------------------------------------------------------------------------------------------------------------------------------------------------------------|--------------------|
| Title and abstract           | 1      | (a) Indicate the study's design with a commonly used term in the title or the abstract                                                                                               | 1                  |
|                              |        | (b) Provide in the abstract an informative and balanced summary of what was done and what was found                                                                                  | 2                  |
| <b>Introduction</b>          |        |                                                                                                                                                                                      |                    |
| Background/rationale         | 2      | Explain the scientific background and rationale for the investigation being reported                                                                                                 | 4                  |
| Objectives                   | 3      | State specific objectives, including any prespecified hypotheses                                                                                                                     | 5                  |
| <b>Methods</b>               |        |                                                                                                                                                                                      |                    |
| Study design                 | 4      | Present key elements of study design early in the paper                                                                                                                              | 5                  |
| Setting                      | 5      | Describe the setting, locations, and relevant dates, including periods of recruitment, exposure, follow-up, and data collection                                                      | 5                  |
| Participants                 | 6      | (a) Give the eligibility criteria, and the sources and methods of selection of participants                                                                                          | 5                  |
| Variables                    | 7      | Clearly define all outcomes, exposures, predictors, potential confounders, and effect modifiers. Give diagnostic criteria, if applicable                                             | 6-7                |
| Data sources/<br>measurement | 8*     | For each variable of interest, give sources of data and details of methods of assessment (measurement). Describe comparability of assessment methods if there is more than one group | 6-7                |
| Bias                         | 9      | Describe any efforts to address potential sources of bias                                                                                                                            | 6                  |
| Study size                   | 10     | Explain how the study size was arrived at                                                                                                                                            | 5                  |
| Quantitative variables       | 11     | Explain how quantitative variables were handled in the analyses. If applicable, describe which groupings were chosen and why                                                         | 7                  |
| Statistical methods          | 12     | (a) Describe all statistical methods, including those used to control for confounding                                                                                                | 7                  |
|                              |        | (b) Describe any methods used to examine subgroups and interactions                                                                                                                  | 7                  |
|                              |        | (c) Explain how missing data were addressed                                                                                                                                          | Table 1            |
|                              |        | (d) If applicable, describe analytical methods taking account of sampling strategy                                                                                                   | n/a                |
|                              |        | (e) Describe any sensitivity analyses                                                                                                                                                | n/a                |
| <b>Results</b>               |        |                                                                                                                                                                                      |                    |

|                          |     |                                                                                                                                                                                                                                                                                                                                                                                                               |                    |
|--------------------------|-----|---------------------------------------------------------------------------------------------------------------------------------------------------------------------------------------------------------------------------------------------------------------------------------------------------------------------------------------------------------------------------------------------------------------|--------------------|
| Participants             | 13* | (a) Report numbers of individuals at each stage of study—eg numbers potentially eligible, examined for eligibility, confirmed eligible, included in the study, completing follow-up, and analysed<br>(b) Give reasons for non-participation at each stage<br>(c) Consider use of a flow diagram                                                                                                               | Figure 1           |
| Descriptive data         | 14* | (a) Give characteristics of study participants (eg demographic, clinical, social) and information on exposures and potential confounders<br>(b) Indicate number of participants with missing data for each variable of interest                                                                                                                                                                               | Table 1<br>Table 1 |
| Outcome data             | 15* | Report numbers of outcome events or summary measures                                                                                                                                                                                                                                                                                                                                                          | 7                  |
| Main results             | 16  | (a) Give unadjusted estimates and, if applicable, confounder-adjusted estimates and their precision (eg, 95% confidence interval). Make clear which confounders were adjusted for and why they were included<br>(b) Report category boundaries when continuous variables were categorized<br>(c) If relevant, consider translating estimates of relative risk into absolute risk for a meaningful time period | 7-8<br>Table 1     |
| Other analyses           | 17  | Report other analyses done—eg analyses of subgroups and interactions, and sensitivity analyses                                                                                                                                                                                                                                                                                                                | 8                  |
| <b>Discussion</b>        |     |                                                                                                                                                                                                                                                                                                                                                                                                               |                    |
| Key results              | 18  | Summarise key results with reference to study objectives                                                                                                                                                                                                                                                                                                                                                      | 8-9                |
| Limitations              | 19  | Discuss limitations of the study, taking into account sources of potential bias or imprecision. Discuss both direction and magnitude of any potential bias                                                                                                                                                                                                                                                    | 10                 |
| Interpretation           | 20  | Give a cautious overall interpretation of results considering objectives, limitations, multiplicity of analyses, results from similar studies, and other relevant evidence                                                                                                                                                                                                                                    | 10                 |
| Generalisability         | 21  | Discuss the generalisability (external validity) of the study results                                                                                                                                                                                                                                                                                                                                         | 10                 |
| <b>Other information</b> |     |                                                                                                                                                                                                                                                                                                                                                                                                               |                    |
| Funding                  | 22  | Give the source of funding and the role of the funders for the present study and, if applicable, for the original study on which the present article is based                                                                                                                                                                                                                                                 | 11                 |

\*Give information separately for cases and controls in case-control studies and, if applicable, for exposed and unexposed groups in cohort and cross-sectional studies.

**Note:** An Explanation and Elaboration article discusses each checklist item and gives methodological background and published examples of transparent reporting. The STROBE checklist is best used in conjunction with this article (freely available on the Web sites of PLoS Medicine at <http://www.plosmedicine.org/>, Annals of Internal Medicine at <http://www.annals.org/>, and Epidemiology at <http://www.epidem.com/>). Information on the STROBE Initiative is available at [www.strobe-statement.org](http://www.strobe-statement.org).

# BMJ Open

## Discrepancies between ClinicalTrials.gov Recruitment Status and Actual Trial Status: a Cross-Sectional Analysis

|                                 |                                                                                                                                                                                                                                                                                                                                              |
|---------------------------------|----------------------------------------------------------------------------------------------------------------------------------------------------------------------------------------------------------------------------------------------------------------------------------------------------------------------------------------------|
| Journal:                        | <i>BMJ Open</i>                                                                                                                                                                                                                                                                                                                              |
| Manuscript ID                   | bmjopen-2017-017719.R1                                                                                                                                                                                                                                                                                                                       |
| Article Type:                   | Research                                                                                                                                                                                                                                                                                                                                     |
| Date Submitted by the Author:   | 17-Aug-2017                                                                                                                                                                                                                                                                                                                                  |
| Complete List of Authors:       | Jones, Christopher; Cooper Medical School of Rowan University, Emergency Medicine<br>Safferman, Michelle; Cooper Medical School of Rowan University, Emergency Medicine<br>Adams, Amanda; Cooper Medical School of Rowan University, Medical Library<br>Platts-Mills, Timothy; University of North Carolina, Chapel Hill, Emergency Medicine |
| <b>Primary Subject Heading</b>: | Research methods                                                                                                                                                                                                                                                                                                                             |
| Secondary Subject Heading:      | Epidemiology                                                                                                                                                                                                                                                                                                                                 |
| Keywords:                       | EPIDEMIOLGY, World Wide Web technology < BIOTECHNOLOGY & BIOINFORMATICS, trial registration, ClinicalTrials.gov                                                                                                                                                                                                                              |
|                                 |                                                                                                                                                                                                                                                                                                                                              |

SCHOLARONE™  
Manuscripts

1  
2  
3  
4  
5  
6  
7  
8  
9  
10  
11  
12  
13  
14  
15  
16  
17  
18  
19  
20  
21  
22  
23  
24  
25  
26  
27  
28  
29  
30  
31  
32  
33  
34  
35  
36  
37  
38  
39  
40  
41  
42  
43  
44  
45  
46  
47  
48  
49  
50  
51  
52  
53  
54  
55  
56  
57  
58  
59  
60

1 **Discrepancies between ClinicalTrials.gov Recruitment Status and Actual Trial Status: a Cross-Sectional**  
2 **Analysis**

4 Christopher W Jones MD\*, Michelle R Safferman BS, Amanda C Adams MLS, Timothy F Platts-Mills MD,  
5 MSc

8 \*Corresponding author:  
9 Christopher Jones  
10 Department of Emergency Medicine  
11 Cooper Medical School of Rowan University  
12 One Cooper Plaza, Suite 152. Camden, NJ. 08103  
13 Jones-christopher@cooperhealth.edu

15 Michelle Safferman  
16 Department of Emergency Medicine  
17 Cooper Medical School of Rowan University  
18 One Cooper Plaza, Suite 152. Camden, NJ. 08103  
19 saffermam7@rowan.edu

21 Amanda Adams  
22 Medical Library  
23 Cooper Medical School of Rowan University  
24 One Cooper Plaza. Camden, NJ. 08103  
25 adams-amanda@cooperhealth.edu

27 Timothy Platts-Mills  
28 Department of Emergency Medicine  
29 University of North Carolina, Chapel Hill.  
30 170 Manning Dr, CB#7594. Chapel Hill, NC 27599.  
31 Tim\_platts-mills@med.unc.edu

33

34

35

36

1  
2  
3 37 **Objectives:** To determine the accuracy of the recruitment status listed on ClinicalTrials.gov as compared  
4  
5 38 to the actual trial status.  
6  
7

8 39 **Design:** Cross-sectional analysis  
9

10 40 **Setting:** Random sample of interventional phase 2-4 clinical trials registered between 2012 and 2015 on  
11  
12 41 ClinicalTrials.gov.  
13

14 42 **Primary outcome measure:** For each trial which was listed within ClinicalTrials.gov as ongoing, two  
15  
16 43 investigators performed a comprehensive literature search for evidence that the trial had actually been  
17  
18 44 completed. For each trial listed as completed or terminated early by ClinicalTrials.gov we compared the  
19  
20 45 date that the trial was actually concluded with the date the registry was updated to reflect the study's  
21  
22 46 conclusion status.  
23  
24

25 47 **Results:** Among the 405 included trials, 92 had a registry status indicating that study activity was either  
26  
27 48 ongoing or the recruitment status was unknown. Of these, published results were available for 34 (37%).  
28  
29 49 Among the 313 concluded trials, the median delay between study completion and a registry update  
30  
31 50 reflecting that the study had ended was 141 days (IQR 48-419), with delays of over one year present for  
32  
33 51 29%. In total, 125 trials (31%) either had a listed recruitment status which was incorrect or had a delay  
34  
35 52 of more than one year between the time the study was concluded and the time the registry recruitment  
36  
37 53 status was updated.  
38  
39

40 54 **Conclusions:** At present, registry recruitment status information in ClinicalTrials.gov is often outdated  
41  
42 55 or wrong. This inaccuracy has implications for the ability of researchers to identify completed trials and  
43  
44 56 accurately characterize all available medical knowledge on a given subject.  
45  
46  
47  
48  
49  
50  
51  
52  
53  
54  
55  
56  
57  
58  
59  
60



1  
2  
3 58 **Article Summary**  
4

5  
6 59 **Strengths and limitations of this study:**  
7  
8

9  
10 60 - Registry recruitment status is often used to identify completed clinical trials, yet the reliability of this  
11  
12 61 information has not been previously assessed.  
13

14  
15 62 - The study involved comprehensive, independent literature searches by multiple investigators, including  
16  
17 63 a medical research librarian.  
18  
19

20  
21 64 - This study design is unable to identify studies which were completed but not published.  
22  
23

24 65  
25  
26  
27  
28  
29  
30  
31  
32  
33  
34  
35  
36  
37  
38  
39  
40  
41  
42  
43  
44  
45  
46  
47  
48  
49  
50  
51  
52  
53  
54  
55  
56  
57  
58  
59  
60

## 66 INTRODUCTION

67 Clinical trial registries play an essential role in helping to ensure the integrity of the published medical  
68 literature.[1] When utilized appropriately by investigators and sponsors, registration helps to ensure  
69 that a publically accessible trial record exists even when results are not published in a peer-reviewed  
70 journal, and that published outcome measures are consistent with prospectively specified trial  
71 outcomes. For these reasons, trial registries are a particularly important tool for systematic reviewers as  
72 they attempt to identify both published and unpublished trial data in order to assess for the possibility  
73 of publication bias.[2]

74 Despite the critical importance of trial registration, compliance with requirements from both the  
75 International Committee of Medical Journal Editors (ICMJE) and governmental regulators which  
76 mandate the prospective registration of clinical trials has been imperfect.[3 4] Meta-researchers have  
77 begun using data from ClinicalTrials.gov and other registries to identify these patterns of limited  
78 compliance in order to publicize and monitor deficiencies.[1 5 6]

79 Within ClinicalTrials.gov, users have the option of utilizing the “advanced search” function to restrict  
80 search results to only those trials with a particular recruitment status (ie. not yet recruiting, recruiting,  
81 completed, etc.). Systematic reviewers and meta-researchers often limit registry searches to trials for  
82 which subject recruitment is documented in the registry as having been completed.[5 7-13] Restricting  
83 reviews to completed studies makes sense because these are the studies for which all the data is  
84 completed and for which the results either are known or could be known. However, little is known  
85 about delays between the time of study completion and the time that ClinicalTrials.gov is updated to  
86 reflect this completion, or the percentage of completed trials which remain listed with an ongoing status  
87 in ClinicalTrials.gov indefinitely. If these delays are significant or a large proportion of registry entries are

1  
2  
3 88 never updated to reflect study completion, then limiting registry searches to only entries with a  
4  
5 89 completed registry status might miss otherwise relevant trials.  
6  
7

8  
9 90 The objective of this study is to quantify delays observed between the end of subject recruitment in  
10  
11 91 registered clinical trials, and the time that the registry entries are updated to reflect that recruitment  
12  
13 92 has ended.  
14  
15

16  
17 93

## 18 19 20 94 **METHODS**

### 21 22 23 95 **Study selection and data collection**

24  
25  
26 96 We searched ClinicalTrials.gov for phase 2-4 interventional studies registered between 01/01/2010 and  
27  
28 97 12/31/2012. From these potentially eligible trials (n=30,524) we randomly selected 500 studies for  
29  
30 98 analysis. Studies with a recruiting status of withdrawn were excluded, as this indicates that the study  
31  
32 99 was halted prior to enrolling any participants. Trials with a recruiting status indicating that recruitment  
33  
34 100 was ongoing and a planned Primary Completion Date (date that primary outcome data for the final  
35  
36 101 subject is collected) listed within ClinicalTrials.gov as being after 1/1/2016 were also excluded, as we  
37  
38 102 hypothesized that the yield from a publication search for trials completed after this date would be low.  
39  
40 103 For each included trial, we obtained information on study phase, size, sponsor, participant  
41  
42 104 demographics, and recruitment status as of January 1, 2017 directly from ClinicalTrials.gov.  
43  
44  
45  
46

47  
48 105 Dates for the following events were also recorded from ClinicalTrials.gov for each included trial: initial  
49  
50 106 registration, study start, and primary completion date (date on which primary outcome data for the last  
51  
52 107 trial participant were collected). When the primary completion date field was missing, we used the  
53  
54 108 study completion date (final date on which any trial data were collected). We considered trials with  
55  
56 109 recruitment statuses of either completed (study concluded normally) or terminated (recruitment  
57  
58  
59  
60

1  
2  
3 110 stopped prematurely and will not resume) to indicate that the study had ended and was unlikely to  
4  
5 111 resume activity. These trials were classified as concluded. We recorded the dates on which the registry  
6  
7 112 entries were updated to reflect that trials had concluded from the History of Changes section within  
8  
9 113 each registry entry. Recruiting statuses which did not clearly reflect that the trial had concluded were  
10  
11 114 recruiting, enrolling by invitation, not yet recruiting, active not recruiting, suspended, and unknown.  
12  
13 115 Trials which were registered more than one month after the study start date were considered  
14  
15 116 retrospectively registered.  
16  
17  
18  
19

### 20 117 **Ongoing or Unknown Completion Status Trials**

21  
22  
23 118 For studies which did not have an updated recruitment status indicating that they had concluded, we  
24  
25 119 performed a comprehensive literature search to identify published evidence that the trial might in fact  
26  
27 120 have been completed. An investigator first reviewed the relevant ClinicalTrials.gov entry for relevant  
28  
29 121 publications and searched Medline via PubMed using trial registration number, keywords, condition  
30  
31 122 studied, intervention, trial title, and investigators' names for matching manuscripts. When the first  
32  
33 123 search identified no corresponding publication, a research librarian repeated this search using PubMed,  
34  
35 124 Embase, and Google Scholar. The final publication search occurred between January and February of  
36  
37 125 2017.  
38  
39  
40  
41

42 126 We assessed matches between registry entries and publications identified by this search strategy using  
43  
44 127 the following trial characteristics: study title, trial design, interventions, primary and secondary  
45  
46 128 outcomes, number of participants, recruitment dates, location, and funding sources. We did not  
47  
48 129 consider trials to be published if the publication did not include outcome data from the primary trial. For  
49  
50 130 example, trial protocols for ongoing trials were not considered evidence of trial completion. We did  
51  
52 131 consider published abstracts and presentations at scientific meetings to be evidence of trial completion,  
53  
54 132 and counted these as publications for this analysis. For the group of included trials with an ongoing or  
55  
56  
57  
58  
59  
60

1  
2  
3 133 unknown recruitment status listed in the registry, the primary outcome was the proportion of studies  
4  
5  
6 134 with outcomes published in the medical literature.  
7

### 8 9 135 **Concluded Trials**

10  
11  
12 136 For studies which were indicated to be concluded based on the recruitment status listed in  
13  
14 137 ClinicalTrials.gov, the primary outcome was the amount of time elapsed between the primary  
15  
16 138 completion date listed in ClinicalTrials.gov and the date on which the ClinicalTrials.gov registry entry was  
17  
18  
19 139 actually updated to indicate that the study had ended and was unlikely to resume activity.  
20

21  
22 140 Secondary outcomes included the proportion of studies registered more than one month after study  
23  
24 141 initiation, and the proportion of studies registered after study completion. We also compared results  
25  
26 142 among subgroups based on trial phase, trial size, and funding source.  
27

28  
29  
30 143 We calculated descriptive data for the primary and secondary outcomes. We also compared the median  
31  
32 144 time elapsed between the change in recruiting status and the time ClinicalTrials.gov was updated to  
33  
34 145 reflect this change between subgroups using Mann Whitney and Kruskal Wallis tests. Chi-square tests  
35  
36 146 were used to make comparisons between categorical variables. P values < 0.05 were considered  
37  
38  
39 147 statistically significant. Statistical analyses were performed using PASW version 18.0 (IBM, Armonk, NY).

40  
41 148 The dataset generated during the current study is available from the corresponding author on  
42  
43  
44 149 reasonable request.  
45

46  
47 150

### 48 49 151 **RESULTS**

50  
51  
52  
53 152 Of the 500 potentially eligible trials which were randomly selected for evaluation, 405 were eligible for  
54  
55 153 inclusion (Figure 1). Phase 2, 3, and 4 trials were all well represented within the study sample, and the  
56  
57  
58  
59  
60

majority of trials (53%) had received at least partial industry funding (Table 1). A large proportion of trials were registered retrospectively, more than one month after the study had started (39%).

**Table 1.** Characteristics of included trials.

| <b>Trial Characteristics</b>                         | <b>All Trials<br/>(n = 405)</b> | <b>Concluded<br/>(n = 313)</b> | <b>Potentially<br/>Ongoing<br/>(n = 92)</b> |
|------------------------------------------------------|---------------------------------|--------------------------------|---------------------------------------------|
| Number of participants, median (IQR)                 | 80 (32-225)                     | 80 (30-230)                    | 80 (40-173)                                 |
| Trial phase, n (%)                                   |                                 |                                |                                             |
| Phase 2                                              | 186                             | 147 (79)                       | 39 (21)                                     |
| Phase 3 or 2/3                                       | 132                             | 101 (77)                       | 31 (23)                                     |
| Phase 4                                              | 87                              | 65 (75)                        | 22 (25)                                     |
| Funding source, n (%) <sup>1</sup>                   |                                 |                                |                                             |
| Industry                                             | 214                             | 187 (87)                       | 27 (13)                                     |
| NIH/US Government                                    | 23                              | 17 (74)                        | 6 (26)                                      |
| Other                                                | 233                             | 155 (67)                       | 78 (33)                                     |
| Trial start date, n (%)                              |                                 |                                |                                             |
| Unlisted                                             | 2                               | 1 (50)                         | 1 (50)                                      |
| Prior to 2006                                        | 15                              | 14 (93)                        | 1 (7)                                       |
| 2006-2009                                            | 37                              | 29 (78)                        | 8 (22)                                      |
| 2010-2011                                            | 235                             | 176 (75)                       | 59 (25)                                     |
| 2012-2014                                            | 116                             | 93 (80)                        | 23 (20)                                     |
| Registered retrospectively, n (%) <sup>3</sup>       | 159                             | 124 (78)                       | 35 (22)                                     |
| Registered prospectively, n (%)                      | 245                             | 189 (77)                       | 56 (23)                                     |
| Major discrepancy in recruitment status <sup>4</sup> | 125                             | 91 (73)                        | 34 (27)                                     |

<sup>1</sup> Trials could have more than one funding source

1  
2  
3 158 <sup>2</sup> National Institutes of Health  
4

5 159 <sup>3</sup> Registration timing relative to recruitment could not be determined for one study  
6  
7

8 160 <sup>4</sup> Listed recruitment status within ClinicalTrials.gov was incorrect or there was a delay of more than one  
9  
10 161 year between when the study concluded and when the registry recruitment status was updated to  
11  
12 162 reflect that recruitment ended.  
13

14  
15 163  
16  
17  
18 164 Out of the 405 included trials, 273 (67%) were listed in ClinicalTrials.gov with a study status of  
19  
20 165 completed, and 40 (10%) had initiated subject recruitment but were terminated early. Ninety-two trials  
21  
22 166 (23%) had a recruitment status which indicated that trial activities were ongoing or that the study status  
23  
24 167 was unknown, including 22 (5%) listed as active or active but not recruiting, and 70 (17%) listed as  
25  
26 168 having an unknown recruiting status. Of these 92 trials with statuses in ClinicalTrials.gov indicating  
27  
28 169 potentially ongoing study activity, we identified a corresponding publication containing outcome data  
29  
30 170 for 34 trials (37%).  
31  
32  
33

34  
35 171 Among the trials with a completed or terminated status (n = 313), 2 were missing the study completion  
36  
37 172 date. Of the remaining 311 trials, the median delay between when a trial was completed and when  
38  
39 173 ClinicalTrials.gov was updated to reflect this change was 142 days (IQR 48-419), with a mean delay of  
40  
41 174 340 days. For 127 trials (41%), the recruitment status was changed promptly, with a delay of less than or  
42  
43 175 equal to 90 days. In 91 trials (29%) this delay was greater than 1 year, and in 39 trials (13%) the delay  
44  
45 176 was greater than two years (Figure 2). Eight trials had delays of more than five years. Retrospectively  
46  
47 177 registered trials had a median delay of 266 days (IQR 62-650 days) between trial completion and when  
48  
49 178 the registered recruitment status was updated, compared to a median of 116 days (IQR 38-260) for  
50  
51 179 prospectively registered trials (p < 0.001). Observed delays did not differ between trials according to  
52  
53 180 funding source or trial phase.  
54  
55  
56  
57  
58  
59  
60

1  
2  
3 181 When considering all 405 included trials, 125 (31%) either had a listed recruitment status which was  
4  
5 182 incorrect (ie trial had been completed but was not listed as such) or had a delay of more than one year  
6  
7 183 between the time the study was completed and the time the recruitment status was updated.  
8  
9  
10 184 Retrospectively registered trials were more likely than prospectively registered trials to have one of  
11  
12 185 these major discrepancies in recruitment status, with discrepancies observed for 46% of retrospectively  
13  
14 186 registered trials and 21% of prospectively registered trials ( $p < 0.001$ ). Major recruitment status  
15  
16 187 discrepancies were particularly common among those trials registered more than one year after the  
17  
18 188 onset of recruitment (37/56, 66%). Major recruitment status discrepancies were also very common  
19  
20 189 among trials which started recruitment before 2006 (14/15, 93%), though this estimate is based on a  
21  
22 190 very small number of trials. Major discrepancies were less common, but not unusual among trials which  
23  
24 191 started recruitment from 2006-2009 (21/37, 57%), from 2010-2011 (59/235, 25%), and from 2012-2014  
25  
26 192 (31/116, 27%). Recruitment status discrepancies did not differ among trials based on funding source or  
27  
28 193 trial phase.  
29  
30  
31  
32  
33  
34 194  
35  
36

## 37 195 **DISCUSSION**

38  
39  
40 196 Among this sample of over 400 phase 2-4 trials registered with ClinicalTrials.gov between 2010 and 2012  
41  
42 197 we identified frequent discrepancies between trial recruitment statuses listed on ClinicalTrials.gov and  
43  
44 198 the actual trial status. Specifically, 37% of trials which were indicated to be ongoing based on available  
45  
46 199 information within the registry had been completed and published. Among completed trials, 29% had a  
47  
48 200 delay of more than a year between trial completion and the ClinicalTrials.gov update reporting trial  
49  
50 201 completion.  
51

52  
53  
54  
55 202 Trial registries are an important tool by which both the authors of clinical guidelines and systematic  
56  
57 203 reviewers can identify relevant clinical trials.[2 14] However, in both cases authors often assume that  
58  
59  
60



1  
2  
3 204 the listed recruitment status is accurate and either restrict their registry searches to completed trials,[7-  
4  
5 205 9] or conclude that those trials with active recruitment statuses are actually still ongoing.[15-19] Our  
6  
7  
8 206 findings show that this assumption is incorrect for a substantial portion of trials. Recruitment status  
9  
10 207 discrepancies were particularly common among trials registered before 2006 and among retrospectively  
11  
12 208 registered trials, which may reflect poor investigator familiarity with registry use in general, failure to  
13  
14 209 prioritize correct registry use, or changing registration patterns over time.

15  
16  
17  
18 210 One potential solution to the problem of outdated recruitment status information is to not limit registry  
19  
20 211 searches to completed trials. For trials which are listed as ongoing, efforts should be made to confirm  
21  
22 212 the recruitment status or search for published results regardless of the registered recruitment status. In  
23  
24 213 addition to a comprehensive search for published results, in some cases these efforts should include  
25  
26 214 contacting investigators or study sponsors to confirm recruitment status. Given the high rate of  
27  
28 215 recruitment status discrepancies observed among retrospectively registered trials and trials registered  
29  
30 216 prior to 2006, the listed ClinicalTrials.gov recruitment status should be considered particularly unreliable  
31  
32 217 for these trials.

33  
34  
35  
36  
37 218 Trial registries serve as a critical source of data about ongoing and completed trials which supplements  
38  
39 219 the published medical literature. However, our findings are consistent with previous studies which have  
40  
41 220 demonstrated that registry information is at times incomplete or out of date. [5 20] This work is  
42  
43 221 performed by meta-researchers, who use registry information to measure compliance with trial  
44  
45 222 registration requirements and to monitor the conduct and reporting of clinical trials.[1] In order to  
46  
47 223 accurately perform this function, it is also important for meta-researches to recognize the limitations we  
48  
49 224 describe with respect to registered trial recruiting statuses. This is particularly important for registry-  
50  
51 225 based investigations into publication bias, as excluding registered trials with a registry status indicating  
52  
53  
54  
55  
56  
57  
58  
59  
60

1  
2  
3 226 that recruitment is ongoing may miss trials which have actually finished enrollment without updating  
4  
5  
6 227 the associated registry entry.[5 10-13]  
7

8  
9 228 Several important limitations should be considered when interpreting these results. First, our findings  
10  
11 229 are based on a sample of phase 2-4 trials registered from 2012 to 2015; these general results may not be  
12  
13 230 applicable to specific classes of clinical trials, and the patterns we observed may change over time.  
14  
15 231 Additionally, we performed a literature search to identify trials which were listed in the registry as being  
16  
17 232 ongoing, but which had actually been completed. It is likely that some additional trials were completed  
18  
19  
20 233 but not yet published; our search would not have identified these trials. Similarly, our literature search  
21  
22 234 may have missed some trials. For these reasons, we may have underestimated the percentage of trials  
23  
24  
25 235 which were completed without updating the registry's recruitment status.  
26

## 27 28 236 **CONCLUSIONS** 29

30  
31 237 In summary, we observed that a significant percentage of clinical trials registered in ClinicalTrials.gov  
32  
33 238 with a recruitment status indicating that the trial is ongoing have actually been completed. Additionally,  
34  
35 239 among completed trials, we observed significant delays in updating the ClinicalTrials.gov recruitment  
36  
37 240 status. Individuals utilizing registry data to supplement a systematic literature search and meta-  
38  
39  
40 241 researchers using registry data to study the conduct and reporting of clinical trials should be aware of  
41  
42 242 these findings to avoid unwarranted assumptions about the recruitment status of registered trials.  
43  
44  
45  
46  
47  
48  
49  
50  
51  
52  
53  
54  
55  
56  
57  
58  
59  
60

1  
2  
3 243 **Funding:** This research received no specific grant from any funding agency in the public, commercial or  
4  
5 244 not-for-profit sectors  
6

7  
8 245  
9

10 246 **Acknowledgements:** None  
11

12 247  
13

14  
15 248 **Authors' contributions:** CJ conceived the study. CJ, MS, AA, and TP all contributed to the study design.  
16

17 249 CJ, MS, and AA performed data collection. CJ performed data analysis and interpretation and drafted the  
18  
19 250 article. All authors provided critical revisions to the article, and all authors read and approved the final  
20  
21 251 manuscript.  
22  
23

24 252  
25

26 253 **Competing interests:** We have read and understood BMJ policy on declaration of interests and declare  
27

28 254 the following interests: CJ is an investigator on unrelated studies sponsored by AstraZeneca, Roche  
29

30 255 Diagnostics, Inc, and Janssen, for which his department received research grants. The remaining authors  
31  
32

33 256 declare no additional competing interests.  
34  
35

36 257  
37

38 258 **Ethics approval:** N/a  
39  
40

41  
42 259 **Data sharing:** The full dataset is available from the corresponding author on reasonable request.  
43  
44

45 260  
46  
47

48 261  
49

50 262  
51

52 263  
53

54 264  
55  
56  
57  
58  
59  
60

## 265 REFERENCES

- 266 1. Zarin DA, Tse T, Williams RJ, et al. Update on Trial Registration 11 Years after the ICMJE Policy Was  
267 Established. *The New England journal of medicine* 2017;**376**(4):383-91 doi:  
268 10.1056/NEJMSr1601330[published Online First: Epub Date]].
- 269 2. Jones CW, Keil LG, Weaver MA, et al. Clinical trials registries are under-utilized in the conduct of  
270 systematic reviews: a cross-sectional analysis. *Systematic reviews* 2014;**3**:126 doi:  
271 10.1186/2046-4053-3-126[published Online First: Epub Date]].
- 272 3. Ross JS, Mulvey GK, Hines EM, et al. Trial publication after registration in ClinicalTrials.gov: a cross-  
273 sectional analysis. *PLoS medicine* 2009;**6**(9):e1000144 doi:  
274 10.1371/journal.pmed.1000144[published Online First: Epub Date]].
- 275 4. Mathieu S, Boutron I, Moher D, et al. Comparison of registered and published primary outcomes in  
276 randomized controlled trials. *Jama* 2009;**302**(9):977-84 doi: 10.1001/jama.2009.1242[published  
277 Online First: Epub Date]].
- 278 5. Anderson ML, Chiswell K, Peterson ED, et al. Compliance with results reporting at ClinicalTrials.gov.  
279 *The New England journal of medicine* 2015;**372**(11):1031-9 doi:  
280 10.1056/NEJMSa1409364[published Online First: Epub Date]].
- 281 6. Jones CW, Keil LG, Holland WC, et al. Comparison of registered and published outcomes in  
282 randomized controlled trials: a systematic review. *BMC medicine* 2015;**13**:282 doi:  
283 10.1186/s12916-015-0520-3[published Online First: Epub Date]].
- 284 7. Jun M, Foote C, Lv J, et al. Effects of fibrates on cardiovascular outcomes: a systematic review and  
285 meta-analysis. *Lancet* 2010;**375**(9729):1875-84 doi: 10.1016/S0140-6736(10)60656-3[published  
286 Online First: Epub Date]].
- 287 8. Karagiannis T, Paschos P, Paletas K, et al. Dipeptidyl peptidase-4 inhibitors for treatment of type 2  
288 diabetes mellitus in the clinical setting: systematic review and meta-analysis. *Bmj*  
289 2012;**344**:e1369 doi: 10.1136/bmj.e1369[published Online First: Epub Date]].
- 290 9. Li L, Shen J, Bala MM, et al. Incretin treatment and risk of pancreatitis in patients with type 2 diabetes  
291 mellitus: systematic review and meta-analysis of randomised and non-randomised studies. *Bmj*  
292 2014;**348**:g2366 doi: 10.1136/bmj.g2366[published Online First: Epub Date]].
- 293 10. Dechartres A, Riveros C, Harroch M, et al. Characteristics and Public Availability of Results of Clinical  
294 Trials on Rare Diseases Registered at Clinicaltrials.gov. *JAMA internal medicine* 2016;**176**(4):556-  
295 8 doi: 10.1001/jamainternmed.2016.0137[published Online First: Epub Date]].
- 296 11. Jones CW, Handler L, Crowell KE, et al. Non-publication of large randomized clinical trials: cross  
297 sectional analysis. *Bmj* 2013;**347**:f6104 doi: 10.1136/bmj.f6104[published Online First: Epub  
298 Date]].
- 299 12. Powell-Smith A, Goldacre B. The TrialsTracker: Automated ongoing monitoring of failure to share  
300 clinical trial results by all major companies and research institutions. *F1000Research*  
301 2016;**5**:2629 doi: 10.12688/f1000research.10010.1[published Online First: Epub Date]].
- 302 13. Ross JS, Tse T, Zarin DA, et al. Publication of NIH funded trials registered in ClinicalTrials.gov: cross  
303 sectional analysis. *Bmj* 2012;**344**:d7292 doi: 10.1136/bmj.d7292[published Online First: Epub  
304 Date]].
- 305 14. Methodology Manual and Policies From the ACCF/AHA Task Force on Practice Guidelines.  
306 [https://professional.heart.org/idc/groups/ahamah-](https://professional.heart.org/idc/groups/ahamah-public/@wcm/@sop/documents/downloadable/ucm_319826.pdf)  
307 [public/@wcm/@sop/documents/downloadable/ucm\\_319826.pdf](https://professional.heart.org/idc/groups/ahamah-public/@wcm/@sop/documents/downloadable/ucm_319826.pdf) Accessed 2/9/2017, 2010.
- 308 15. Robinson PD, Kalkanis SN, Linskey ME, et al. Methodology used to develop the AANS/CNS  
309 management of brain metastases evidence-based clinical practice parameter guidelines. *Journal*  
310 *of neuro-oncology* 2010;**96**(1):11-6 doi: 10.1007/s11060-009-0059-2[published Online First:  
311 Epub Date]].

- 1  
2  
3 312 16. Zarychanski R, Abou-Setta AM, Turgeon AF, et al. Association of hydroxyethyl starch administration  
4 313 with mortality and acute kidney injury in critically ill patients requiring volume resuscitation: a  
5 314 systematic review and meta-analysis. *Jama* 2013;**309**(7):678-88 doi:  
6 315 10.1001/jama.2013.430[published Online First: Epub Date]].  
7  
8 316 17. Ker K, Edwards P, Perel P, et al. Effect of tranexamic acid on surgical bleeding: systematic review and  
9 317 cumulative meta-analysis. *Bmj* 2012;**344**:e3054 doi: 10.1136/bmj.e3054[published Online First:  
10 318 Epub Date]].  
11 319 18. Bergman P, Lindh AU, Bjorkhem-Bergman L, et al. Vitamin D and Respiratory Tract Infections: A  
12 320 Systematic Review and Meta-Analysis of Randomized Controlled Trials. *PLoS one*  
13 321 2013;**8**(6):e65835 doi: 10.1371/journal.pone.0065835[published Online First: Epub Date]].  
14 322 19. Masters GA, Temin S, Azzoli CG, et al. Systemic Therapy for Stage IV Non-Small-Cell Lung Cancer:  
15 323 American Society of Clinical Oncology Clinical Practice Guideline Update. *Journal of clinical*  
16 324 *oncology : official journal of the American Society of Clinical Oncology* 2015;**33**(30):3488-515  
17 325 doi: 10.1200/JCO.2015.62.1342[published Online First: Epub Date]].  
18 326 20. Riveros C, Dechartres A, Perrodeau E, et al. Timing and completeness of trial results posted at  
19 327 *ClinicalTrials.gov* and published in journals. *PLoS medicine* 2013;**10**(12):e1001566 doi:  
20 328 10.1371/journal.pmed.1001566[published Online First: Epub Date]].  
21  
22  
23  
24 329  
25  
26  
27  
28  
29  
30  
31  
32  
33  
34  
35  
36  
37  
38  
39  
40  
41  
42  
43  
44  
45  
46  
47  
48  
49  
50  
51  
52  
53  
54  
55  
56  
57  
58  
59  
60

1  
2  
3 330 **Figure 1.** Flowchart of included trials.  
4

5 331

6  
7 332

8  
9  
10 333 **Figure 2.** Delays in updating ClinicalTrials.gov following trial conclusion.

11  
12 334 Legend: Histogram of completed or terminated trials (n=311), depicting delays between the actual date  
13 335 of trial conclusion and the date on which ClinicalTrials.gov was updated to indicate trial conclusion.<sup>1</sup>

14  
15 336

16  
17  
18 337 <sup>1</sup> Does not show eight outliers with delays of greater than 54 months. Trial completion dates were also  
19 338 not listed for two trials.

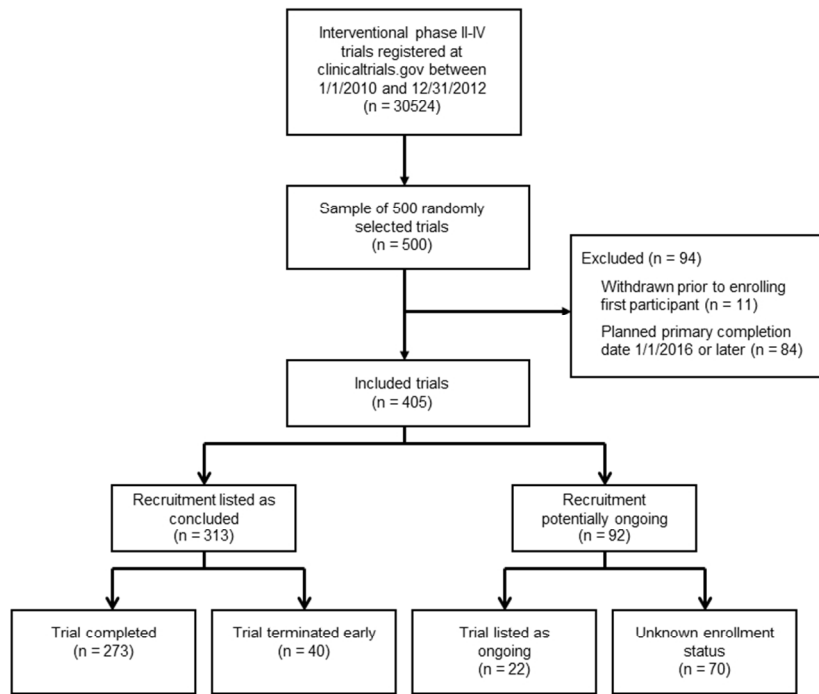

30  
31  
32  
33  
34  
35  
36  
37  
38  
39  
40  
41  
42  
43  
44  
45  
46  
47  
48  
49  
50  
51  
52  
53  
54  
55  
56  
57  
58  
59  
60

**Figure 1.** Flowchart of included trials

Flowchart of included trials.

254x190mm (96 x 96 DPI)

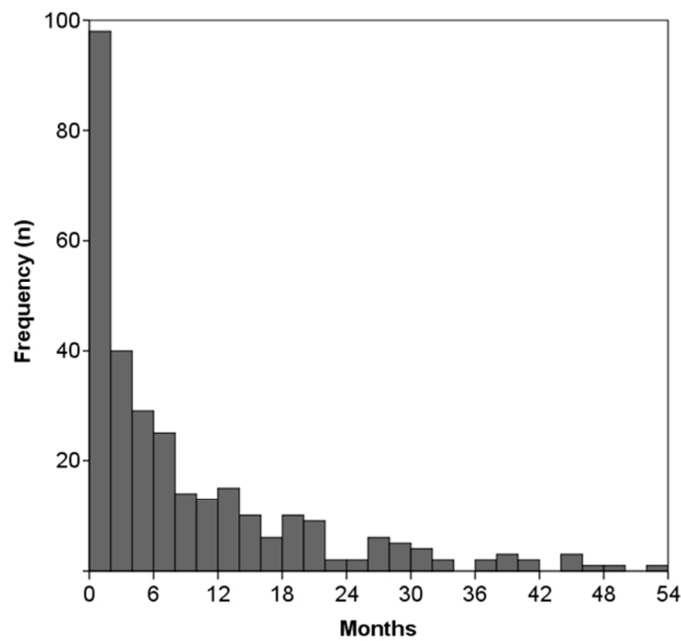

Figure 2

215x279mm (96 x 96 DPI)



STROBE 2007 (v4) Statement—Checklist of items that should be included in reports of *cross-sectional studies*

| Section/Topic             | Item # | Recommendation                                                                                                                                                                       | Reported on page # |
|---------------------------|--------|--------------------------------------------------------------------------------------------------------------------------------------------------------------------------------------|--------------------|
| Title and abstract        | 1      | (a) Indicate the study’s design with a commonly used term in the title or the abstract                                                                                               | 1                  |
|                           |        | (b) Provide in the abstract an informative and balanced summary of what was done and what was found                                                                                  | 2                  |
| <b>Introduction</b>       |        |                                                                                                                                                                                      |                    |
| Background/rationale      | 2      | Explain the scientific background and rationale for the investigation being reported                                                                                                 | 4                  |
| Objectives                | 3      | State specific objectives, including any prespecified hypotheses                                                                                                                     | 5                  |
| <b>Methods</b>            |        |                                                                                                                                                                                      |                    |
| Study design              | 4      | Present key elements of study design early in the paper                                                                                                                              | 5                  |
| Setting                   | 5      | Describe the setting, locations, and relevant dates, including periods of recruitment, exposure, follow-up, and data collection                                                      | 5                  |
| Participants              | 6      | (a) Give the eligibility criteria, and the sources and methods of selection of participants                                                                                          | 5                  |
| Variables                 | 7      | Clearly define all outcomes, exposures, predictors, potential confounders, and effect modifiers. Give diagnostic criteria, if applicable                                             | 6-7                |
| Data sources/ measurement | 8*     | For each variable of interest, give sources of data and details of methods of assessment (measurement). Describe comparability of assessment methods if there is more than one group | 6-7                |
| Bias                      | 9      | Describe any efforts to address potential sources of bias                                                                                                                            | 6                  |
| Study size                | 10     | Explain how the study size was arrived at                                                                                                                                            | 5                  |
| Quantitative variables    | 11     | Explain how quantitative variables were handled in the analyses. If applicable, describe which groupings were chosen and why                                                         | 7                  |
| Statistical methods       | 12     | (a) Describe all statistical methods, including those used to control for confounding                                                                                                | 7                  |
|                           |        | (b) Describe any methods used to examine subgroups and interactions                                                                                                                  | 7                  |
|                           |        | (c) Explain how missing data were addressed                                                                                                                                          | Table 1            |
|                           |        | (d) If applicable, describe analytical methods taking account of sampling strategy                                                                                                   | n/a                |
|                           |        | (e) Describe any sensitivity analyses                                                                                                                                                | n/a                |
| <b>Results</b>            |        |                                                                                                                                                                                      |                    |

|                          |     |                                                                                                                                                                                                                                                                                                                                                                                                               |                    |
|--------------------------|-----|---------------------------------------------------------------------------------------------------------------------------------------------------------------------------------------------------------------------------------------------------------------------------------------------------------------------------------------------------------------------------------------------------------------|--------------------|
| Participants             | 13* | (a) Report numbers of individuals at each stage of study—eg numbers potentially eligible, examined for eligibility, confirmed eligible, included in the study, completing follow-up, and analysed<br>(b) Give reasons for non-participation at each stage<br>(c) Consider use of a flow diagram                                                                                                               | Figure 1           |
| Descriptive data         | 14* | (a) Give characteristics of study participants (eg demographic, clinical, social) and information on exposures and potential confounders<br>(b) Indicate number of participants with missing data for each variable of interest                                                                                                                                                                               | Table 1<br>Table 1 |
| Outcome data             | 15* | Report numbers of outcome events or summary measures                                                                                                                                                                                                                                                                                                                                                          | 7-8                |
| Main results             | 16  | (a) Give unadjusted estimates and, if applicable, confounder-adjusted estimates and their precision (eg, 95% confidence interval). Make clear which confounders were adjusted for and why they were included<br>(b) Report category boundaries when continuous variables were categorized<br>(c) If relevant, consider translating estimates of relative risk into absolute risk for a meaningful time period | 7-8<br>Table 1     |
| Other analyses           | 17  | Report other analyses done—eg analyses of subgroups and interactions, and sensitivity analyses                                                                                                                                                                                                                                                                                                                | 8-9                |
| <b>Discussion</b>        |     |                                                                                                                                                                                                                                                                                                                                                                                                               |                    |
| Key results              | 18  | Summarise key results with reference to study objectives                                                                                                                                                                                                                                                                                                                                                      | 9                  |
| Limitations              | 19  | Discuss limitations of the study, taking into account sources of potential bias or imprecision. Discuss both direction and magnitude of any potential bias                                                                                                                                                                                                                                                    | 10-11              |
| Interpretation           | 20  | Give a cautious overall interpretation of results considering objectives, limitations, multiplicity of analyses, results from similar studies, and other relevant evidence                                                                                                                                                                                                                                    | 11                 |
| Generalisability         | 21  | Discuss the generalisability (external validity) of the study results                                                                                                                                                                                                                                                                                                                                         | 10                 |
| <b>Other information</b> |     |                                                                                                                                                                                                                                                                                                                                                                                                               |                    |
| Funding                  | 22  | Give the source of funding and the role of the funders for the present study and, if applicable, for the original study on which the present article is based                                                                                                                                                                                                                                                 | 12                 |

\*Give information separately for cases and controls in case-control studies and, if applicable, for exposed and unexposed groups in cohort and cross-sectional studies.

**Note:** An Explanation and Elaboration article discusses each checklist item and gives methodological background and published examples of transparent reporting. The STROBE checklist is best used in conjunction with this article (freely available on the Web sites of PLoS Medicine at <http://www.plosmedicine.org/>, Annals of Internal Medicine at <http://www.annals.org/>, and Epidemiology at <http://www.epidem.com/>). Information on the STROBE Initiative is available at [www.strobe-statement.org](http://www.strobe-statement.org).
